# Supplementary material for: Characteristics and outcome of rhabdomyolysis in acute ischemic stroke patients: a 10-year retrospective study
Source: PeerJ. 2026 Jan 20;14:e20645. doi: 10.7717/peerj.20645 (PMC12829463; doi:10.7717/peerj.20645)
Supplement: Supplemental Information 3 — RML: Stands for Rhabdomyolysis Group. Ctrl: Represents the control group. N: Represents the absence of original data. [file peerj-14-20645-s003.xlsx]

## Sheet:  146 RML+146  Ctrl 
group	sex	age	Discharge against medical advice	NIHSS	NIHSS>15	Consciousness disorder	respiratory failure	Diabetes	Hypertension	Coronary heart disease	lipid-lowering drugs	type of lipid-lowering drug	dose	pulmonary infection	infection	Muscle pain	Muscle weakness	Dark-colored urine	Peak creatine kinase date	creatine kinase	Creatine kinase isoenzyme	Troponin I	Troponin I>0.03	Myoglobin	Myoglobin>1000	Hemoglobin	C-reactive protein	C-reactive protein>10	Serum creatinine	Serum uric acid	Serum albumin	Serum albumin<35	Serum alanine aminotransferase	Serum alanine aminotransferase>40	Cholesterol	Triglycerides	Low-density lipoprotein	Acute kidney injury	die	Deteriorated	Discharged after improvement	cost	duration
1	0	89	0	16	1	1	0	1	1	0	0	0	0	1	1	0	1	0	2020-02-15	2990	69	0.03	0	689.9	0	111	14.2	1	66	157	26.8	1	31	0	4.67	2.64	3.03	1	0	0	1	42187.2	19
1	1	61	0	2	0	0	0	0	0	0	0	0	0	1	1	0	1	0	2017-09-18	5204	69	0.03	0	204.5	0	81	78.7	1	58	161	32	1	35	0	3.56	0.62	2.16	0	0	0	1	17037.8	12
1	1	59	0	5	0	1	0	1	0	0	0	0	0	1	1	0	1	0	2020-01-26	2719	70	0.07	1	429.9	0	150	172.1	1	60	191	25.3	1	129	1	2.71	2.2	1.43	0	0	0	1	24091.7	10
0	0	56	0	0	0	0	0	0	1	0	0	0	0	1	1	0	0	0	2023-09-06	36	14	0.015	0	42	0	113	2.2	0	80	208	33.8	1	16	0	3.08	0.73	1.61	0	0	0	1	12489.4	10
1	1	57	1	9	0	1	0	0	0	0	0	0	0	1	1	0	1	0	2018-08-18	1316	18	0.31	1	570.3	0	166	10.1	1	97	214	41.6	0	29	0	3.45	2.99	1.51	0	0	1	0	8189.69	2
1	1	90	0	N	0	0	0	0	1	0	1	Atorvastatin	20	1	1	0	0	0	2018-01-16	1150	18	0.04	1	229.8	0	146	76.4	1	81	141	37.2	0	9	0	4.71	1.56	2.9	0	0	0	1	17155.2	11
0	0	63	0	0	0	0	0	0	1	0	1	Atorvastatin	20	0	0	0	0	0	2021-06-21	43	5	0.01	0	22.2	0	132	<0.5	0	63	148	39.4	0	12	0	5.83	1.22	3.55	0	0	0	1	14628.4	6
1	1	64	0	8	0	0	0	1	1	1	1	Atorvastatin	40	1	1	0	1	0	2018-08-14	1373	22	0.76	1	793.3	0	134	257.8	1	121	157	29	1	44	1	2.01	1.29	0.73	1	0	0	1	46142.8	25
1	0	83	0	4	0	0	0	0	1	0	1	Atorvastatin	40	1	1	0	1	0	2023-12-05	1062	36	0.014	0	266	0	150	100.9	1	101	183	33.4	1	16	0	2.76	0.51	1.43	0	0	0	1	30219.2	9
1	1	84	0	8	0	0	0	0	1	1	1	Atorvastatin	20	1	1	0	1	0	2016-09-18	4231	60	1.02	1	1551.3	1	129	>200	1	72	195	27.4	1	69	1	2.17	0.57	0.62	0	0	0	1	60952.5	25
1	1	90	0	2	0	1	0	0	1	0	1	Atorvastatin	20	1	1	0	1	0	2019-12-14	1416	37	0.03	0	563.5	0	66	75.1	1	93	199	29.2	1	52	1	3.31	0.95	1.7	0	0	0	1	58194.4	22
1	1	74	0	15	0	1	1	1	1	1	1	Atorvastatin	20	1	1	0	1	0	2021-11-16	1504	21	0.05	1	1195.9	1	136	11	1	82	207	43	0	19	0	3.93	0.94	2.01	1	0	0	1	71618.4	27
0	0	67	0	1	0	0	0	0	0	0	1	Atorvastatin	20	1	1	0	0	0	2023-11-21	166	18	0.016	0	55.9	0	96	12.1	1	74	219	41.8	0	19	0	3.64	0.7	1.64	0	0	0	1	23831	9
1	1	65	0	2	0	0	0	0	0	0	1	Atorvastatin	20	1	1	0	1	0	2023-08-14	1238	16	0.03	0	157	0	107	191.4	1	68	220	32.3	1	69	1	3.9	0.84	2.21	0	0	0	1	41828	17
1	1	68	0	22	1	1	0	0	1	1	1	Atorvastatin	20	1	1	0	1	0	2021-02-15	3845	149	0.08	1	>3862	1	141	<0.5	0	49	225	37.2	0	14	0	4.24	1.28	2.44	1	0	0	1	72346	29
1	1	74	0	21	1	1	0	0	1	0	1	Atorvastatin	40	1	1	0	1	0	2018-11-01	2787	35	1.38	1	1076.1	1	136	52.3	1	85	226	28.4	1	29	0	2.62	1.22	1.25	0	0	0	1	35377.6	14
1	0	82	0	29	1	1	0	0	1	0	1	Atorvastatin	20	1	1	0	1	0	2015-10-27	1469	29	0.01	0	168.1	0	161	<5	0	83	229	41.1	0	30	0	7.1	2.28	4.42	0	0	0	1	38777.6	21
1	1	81	0	3	0	0	0	0	1	0	1	Atorvastatin	20	1	1	0	1	0	2015-08-07	1418	34	0.01	0	271.3	0	133	16.52	1	70	243	36	0	16	0	4.41	0.78	2.92	0	0	0	1	39129.3	19
1	1	84	0	4	0	0	0	1	1	0	1	Atorvastatin	20	1	1	0	0	0	2018-02-06	3291	32	0.56	1	2166.7	1	141	12.6	1	91	244	36.9	0	28	0	3.75	1.01	2.19	1	1	1	0	67898.5	23
1	1	79	0	1	0	0	0	1	1	0	1	Atorvastatin	20	1	1	0	0	0	2021-01-02	6921	126	0.63	1	>3962	1	87	10.1	1	110	244	32.5	1	12	0	1.92	0.92	1.08	1	1	1	0	79696.7	26
1	0	80	0	14	0	0	0	1	0	1	1	Atorvastatin	20	1	1	0	1	0	2019-07-18	3094	88	0.18	1	633.9	0	134	10.6	1	71	246	45.5	0	10	0	4.46	1.19	2.98	0	0	0	1	53384.6	26
1	1	65	0	3	0	0	0	1	1	0	1	Atorvastatin	20	0	0	0	1	0	2022-12-24	1033	23	0.014	0	302	0	138	48.4	1	59	251	37.7	0	22	0	2.49	0.68	1.03	0	0	0	1	23541.8	12
1	1	62	0	4	0	0	0	1	1	0	1	Atorvastatin	20	1	1	0	1	0	2024-01-02	4704	129	0.037	1	313	0	129	44.2	1	98	251	34.9	1	40	0	3.45	0.91	1.14	0	0	0	1	23492.8	9
1	0	88	0	8	0	1	0	0	1	0	1	Atorvastatin	20	1	1	0	1	0	2020-02-11	9153	362	1.19	1	>3997	1	133	19.8	1	75	254	36	0	6	0	4.39	0.85	2.51	1	0	0	1	210899	76
1	1	63	0	0	0	0	0	0	0	0	1	Atorvastatin	20	1	1	0	1	0	2023-06-10	1050	15	0.013	0	87.2	0	140	110.6	1	52	254	31.6	1	25	0	3.32	0.98	1.79	0	0	0	1	16446	6
0	0	67	0	0	0	0	0	0	1	0	1	Atorvastatin	20	1	1	0	0	0	2023-11-17	26	10	0.025	0	23.6	0	116	<5	0	43	256	35.7	0	7	0	3.31	0.78	1.7	0	0	0	1	16359.4	22
0	0	66	0	4	0	0	0	0	1	0	1	Atorvastatin	20	0	1	0	1	0	2022-03-05	54	13	0.01	0	28.4	0	127	<0.5	0	62	258	37.5	0	17	0	3.12	0.63	1.43	0	0	0	1	20212.6	14
1	1	83	0	1	0	0	0	0	1	0	1	Atorvastatin	20	1	1	0	0	0	2018-01-22	1470	21	0.04	1	333.8	0	141	106.1	1	88	262	28	1	25	0	2.77	1.18	1.25	0	0	0	1	21219.1	13
1	1	82	0	1	0	0	0	1	1	0	1	Atorvastatin	20	0	0	0	1	0	2018-12-12	1274	17	0.01	0	122.6	0	122	13.6	1	82	268	34.4	1	21	0	4.16	1.88	2.52	0	0	0	1	22207.2	14
1	1	50	0	7	0	1	1	1	1	0	1	Atorvastatin	20	1	1	0	0	0	2019-10-15	12120	217	0.2	1	>3811	1	168	187.9	1	96	270	30.8	1	11	0	4.23	1.47	3.46	1	1	1	0	62759.3	18
1	1	78	0	0	0	0	0	1	0	0	1	Atorvastatin	20	1	1	0	0	0	2019-02-07	2373	21	0.05	1	394.3	0	109	23.5	1	56	275	29.4	1	53	1	3.82	2.27	1.95	0	0	0	1	3114.4	1
0	0	74	0	2	0	0	0	0	0	0	1	Atorvastatin	20	1	1	0	1	0	2019-02-09	88	10	0.01	0	37.4	0	138	4.9	0	70	275	34.8	1	9	0	2.73	0.97	1.79	0	0	0	1	21902.7	11
0	0	70	0	2	0	0	1	0	0	0	1	Atorvastatin	40	1	1	0	1	0	2018-02-07	105	6	0.03	0	86.5	0	124	38.7	1	118	277	33.8	1	17	0	4.62	1.05	3.07	0	0	0	1	31935.4	17
1	1	91	0	17	1	1	0	1	0	0	1	Atorvastatin	20	1	1	0	1	0	2021-04-19	1162	141	1.86	1	>4144	1	121	4.1	0	63	278	30.1	1	13	0	5.86	1.36	4.16	1	1	1	0	58457.2	21
0	0	77	0	0	0	0	0	1	0	0	1	Atorvastatin	40	0	0	0	1	0	2018-07-04	223	14	0.01	0	31	0	144	0.5	0	83	299	38.5	0	15	0	5.16	1.56	3.45	0	0	0	1	15424.9	9
0	0	76	0	3	0	0	0	1	0	0	1	Atorvastatin	20	0	0	0	1	0	2023-11-09	105	7	0.011	0	24.1	0	139	6.2	0	57	323	37.6	0	31	0	5.72	1.41	3.87	0	0	0	1	29148.7	15
0	0	77	0	0	0	0	0	0	0	0	1	Atorvastatin	20	0	0	0	0	0	2023-09-06	148	8	0.005	0	34.6	0	148	0.6	0	82	325	37.4	0	18	0	4	1.01	2.42	0	0	0	1	14174.8	6
0	0	75	0	0	0	0	0	0	1	0	1	Atorvastatin	20	0	0	0	1	0	2016-09-22	70	19	0.01	0	35	0	153	<5	0	106	326	44	0	11	0	4.79	2.14	2.98	0	0	0	1	14840.9	7
0	0	78	0	4	0	0	0	0	1	0	1	Atorvastatin	20	0	0	0	1	0	2018-01-02	74	11	0.01	0	60.8	0	151	5.6	0	87	354	41.3	0	9	0	5.86	1.54	4.05	0	0	0	1	17277.6	14
0	0	82	0	0	0	0	0	1	1	0	1	Atorvastatin	40	0	0	0	1	0	2017-07-17	27	<3	0.01	0	8.2	0	151	<5	0	79	371	37.5	0	9	0	5.63	4.21	3.08	0	0	0	1	26623.2	16
0	0	81	0	6	0	1	0	1	1	0	1	Atorvastatin	20	0	0	0	1	0	2020-08-22	322	14	0.02	0	126.2	0	129	3.3	0	68	380	35.9	0	7	0	6.47	1.11	4.18	0	0	0	1	26418.8	10
0	0	84	0	2	0	0	0	1	1	1	1	Atorvastatin	40	0	0	0	1	0	2018-07-17	34	<3	0.01	0	34.3	0	149	1.6	0	93	422	36.4	0	8	0	3.26	1.86	1.85	0	0	0	1	15757	10
0	0	83	0	6	0	0	0	0	1	0	1	Atorvastatin	40	0	0	0	1	0	2018-07-03	37	<3	0.01	0	24.2	0	141	6.8	0	116	424	35.3	0	12	0	4.13	1.46	2.69	0	0	0	1	21068.3	15
0	0	80	0	0	0	0	0	1	0	0	1	Atorvastatin	20	0	1	0	0	0	2023-11-09	76	15	0.029	0	63.2	0	123	8.9	0	125	454	37.5	0	11	0	3.67	1.9	2.1	0	0	0	1	21925	11
0	0	80	0	0	0	0	0	1	0	0	1	Atorvastatin	20	0	0	0	0	0	2020-03-03	45	3	0.01	0	24.8	0	126	2	0	96	224	34.4	1	17	0	4.33	0.75	2.37	0	0	0	1	26293.6	9
0	0	82	0	2	0	0	0	0	0	0	1	Atorvastatin	20	0	0	0	1	0	2021-10-14	90	18	0.01	0	32.7	0	157	18	1	73	440	35.7	0	7	0	4.86	0.85	3.59	0	0	0	1	38176.7	21
0	0	82	0	0	0	0	0	0	1	0	1	Atorvastatin	20	0	0	0	1	0	2019-04-02	105	13	0.01	0	62.3	0	141	6	0	100	456	40	0	20	0	3.91	1.27	3.31	0	0	0	1	20205.8	9
0	0	83	0	9	0	0	0	0	0	0	1	Atorvastatin	20	0	0	0	0	0	2019-09-03	49	8	0.01	0	36.2	0	154	11	1	77	249	37.5	0	10	0	2.96	1.31	1.86	0	0	0	1	11965.1	7
0	0	83	0	2	0	0	0	0	1	0	1	Atorvastatin	20	0	0	0	1	0	2017-07-05	83	7	0.01	0	30.7	0	137	5	0	103	246	38	0	19	0	3.83	2.6	2.18	0	0	0	1	17073.3	10
0	0	84	0	N	0	0	0	0	1	1	1	Atorvastatin	40	0	0	0	0	0	2019-06-20	51	4	0.01	0	31.2	0	147	2.6	0	88	528	38.9	0	9	0	6.4	2.02	4.41	0	0	0	1	10018.3	9
0	0	84	0	0	0	0	0	0	1	0	1	Atorvastatin	20	0	0	0	0	0	2019-08-07	86	12	0.01	0	110.7	0	112	2	0	115	420	39.6	0	16	0	6.57	1.21	4.3	0	0	0	1	12530.2	5
0	0	82	0	1	0	0	0	1	1	0	1	Atorvastatin	20	0	0	0	0	0	2022-08-09	20	10	0.007	0	21	0	131	0.6	0	46	277	41.7	0	8	0	4.56	2.19	2.87	0	0	0	1	20723	12
0	0	89	0	3	0	0	0	0	1	0	1	Atorvastatin	20	0	0	0	1	0	2020-03-31	100	6	0.01	0	48.6	0	127	12.5	1	73	374	34.2	1	17	0	4.78	0.84	2.86	0	0	0	1	21530.4	9
0	0	85	0	16	1	1	0	0	0	1	1	Atorvastatin	40	1	1	0	1	0	2018-11-15	268	22	0.18	1	125	0	131	31	1	79	296	36.8	0	88	1	5.01	1.1	3.21	0	0	0	1	63957.5	34
0	0	87	0	1	0	0	0	1	1	0	1	Atorvastatin	20	0	0	0	1	0	2021-05-07	54	8	0.01	0	25.2	0	142	2.8	0	77	344	37.8	0	10	0	5.33	7.88	1.75	0	0	0	1	22368.4	11
0	0	85	0	0	0	0	1	0	1	0	1	Atorvastatin	20	1	1	0	0	0	2018-02-09	94	30	0.14	1	636.7	0	139	115.8	1	183	684	28.5	1	25	0	4.93	2.05	2.66	0	1	1	0	11087.6	4
0	0	85	0	0	0	0	0	0	1	0	1	Atorvastatin	20	1	1	0	1	0	2023-06-13	57	9	0.033	1	57	0	131	1.1	0	271	653	33.9	1	11	0	7.32	0.92	4.99	1	0	0	1	28335.3	13
0	0	86	0	3	0	0	0	0	0	0	1	Atorvastatin	20	0	0	0	1	0	2023-06-16	148	16	0.012	0	38.5	0	144	0.7	0	70	369	37.6	0	26	0	2.98	1	1.36	0	0	0	1	18945	10
0	0	88	0	N	0	0	0	0	0	0	1	Atorvastatin	20	0	0	0	0	0	2020-10-03	74	7	0.01	0	53.8	0	105	0.5	0	92	515	32.4	1	10	0	2.55	0.42	1.26	0	0	0	1	20309.2	13
0	0	89	0	9	0	1	0	0	1	1	1	Atorvastatin	20	1	1	0	1	0	2018-02-17	42	18	0.03	0	77.1	0	112	56	1	100	319	36.6	0	14	0	3.55	0.85	1.97	0	0	0	1	21227.4	15
0	0	85	0	N	0	0	0	0	1	1	1	Atorvastatin	20	0	0	0	0	0	2019-07-29	98	8	0.01	0	49.2	0	105	0.3	0	53	341	33.3	1	19	0	2.74	1.1	1.62	0	0	0	1	17173.4	8
0	0	89	0	8	0	0	0	0	0	0	1	Atorvastatin	20	0	0	0	1	0	2022-11-21	320	8	0.016	0	199	0	117	6.2	0	79	479	34.4	1	12	0	6.62	1.59	4.72	0	0	0	1	30174	15
0	0	86	0	5	0	1	0	1	1	0	1	Atorvastatin	20	1	1	0	1	0	2016-09-13	110	21	0.05	1	240.3	0	101	5	0	97	168	31.4	1	18	0	3.95	1.66	2.35	0	0	0	1	38436.9	17
0	0	88	0	0	0	0	0	0	1	0	1	Atorvastatin	40	0	0	0	0	0	2020-01-22	117	8	0.01	0	26.9	0	113	2	0	58	220	36.6	0	13	0	4.3	1.05	2.43	0	0	0	1	23528.4	14
0	0	87	0	8	0	0		1	1	1	1	Atorvastatin	20	1	1	0	1	0	2016-09-24	66	19	0.02	0	61	0	129	61.92	1	114	552	35.7	0	14	0	4.46	1	2.9	0	0	0	1	33530.5	15
0	0	89	0	0	0	0	0	0	0	0	1	Atorvastatin	20	0	0	0	0	0	2022-06-24	53	7	0.01	0	20.4	0	168	2.4	0	68	361	38.9	0	16	0	3.76	1.36	1.74	0	0	0	1	17591.1	8
0	0	85	0	1	0	0	0	1	1	0	1	Atorvastatin	20	0	0	0	1	0	2019-04-23	114	17	0.01	0	59.6	0	125	2.7	0	103	282	45	0	21	0	5.27	1.67	3.19	0	0	0	1	14091.2	8
0	1	37	1	25	1	1	0	0	1	0	1	Atorvastatin	20	1	1	0	0	0	2016-12-13	521	18	0.07	1	199.3	0	137	76.83	1	102	211	33.3	1	23	0	4.31	0.69	2.14	1	0	0	0	86959.4	40
0	1	48	0	1	0	0	0	0	1	0	1	Atorvastatin	40	0	1	0	0	0	2018-10-27	108	65	0.01	0	105.1	0	134	2.1	0	85	337	34.6	1	17	0	4.96	0.74	3.18	0	0	0	1	21849.2	13
0	1	51	0	0	0	0	0	0	1	0	1	Atorvastatin	20	0	0	0	0	0	2020-09-28	76	12	0.01	0	31	0	121	1.6	0	86	485	32.5	1	26	0	3.05	1.06	1.51	0	0	0	1	25630.8	14
0	1	54	0	1	0	0	0	1	1	0	1	Atorvastatin	20	0	0	0	0	0	2022-06-24	221	10	0.01	0	90	0	117	2.1	0	248	430	35.1	0	18	0	3.65	1.48	2.16	0	0	0	1	18142.2	7
0	1	59	1	22	1	1	0	1	1	1	1	Atorvastatin	20	1	1	0	0	0	2022-10-22	243	12	0.192	1	503	0	128	260	1	233	N	39.3	0	18	0	N	N	N	0	0	1	0	4895.63	1
0	1	59	0	2	0	0	0	0	0	0	1	Atorvastatin	20	0	0	0	1	0	2019-02-22	118	12	0.01	0	25.9	0	137	1.8	0	69	314	44.1	0	20	0	5.94	1.47	3.54	0	0	0	1	16268.3	8
0	1	56	0	1	0	0	0	0	0	0	1	Atorvastatin	40	0	0	0	0	0	2019-03-25	80	7	0.01	0	18.8	0	124	7	0	50	291	39.8	0	16	0	4.65	2.02	2.8	0	0	0	1	19573.7	9
0	1	58	0	0	0	0	0	0	0	0	1	Atorvastatin	20	0	0	0	0	0	2021-03-01	53	3	0.01	0	23.3	0	116	1.2	0	53	319	37	0	14	0	5.48	0.99	3.61	0	0	0	1	27911.3	15
0	1	55	0	0	0	0	0	0	0	0	1	Atorvastatin	20	0	0	0	0	0	2016-03-30	548	16	0.01	0	157.4	0	107	5.61	0	90	321	27.8	1	21	0	2.85	0.71	1.22	0	0	0	1	14257.1	7
0	1	58	1	17	1	0	1	1	1	0	1	Atorvastatin	20	1	1	0	1	0	2023-02-06	98	4	0.015	0	170	0	112	14.6	1	78	327	36.5	0	14	0	6.23	0.78	4.32	0	0	1	0	20849.2	8
0	1	59	0	0	0	0	0	0	1	0	1	Atorvastatin	20	0	0	0	0	0	2021-02-18	77	5	0.01	0	25.5	0	110	0.5	0	71	321	34.9	1	12	0	3.67	1.13	2.25	0	0	0	1	19107.8	10
0	1	63	0	2	0	0	0	0	0	0	1	Atorvastatin	20	0	0	0	1	0	2022-06-27	62	7	0.01	0	19.7	0	133	0.7	0	58	328	42.6	0	16	0	5.21	2.56	2.5	0	0	0	1	25935.6	10
0	1	63	0	4	0	0	0	1	1	0	1	Atorvastatin	20	0	0	0	1	0	2023-11-02	64	8	0.033	1	62.9	0	123	5	0	115	305	39.6	0	28	0	5.74	2.82	3.46	0	0	0	1	21964.6	11
0	1	63	0	0	0	0	0	0	1	0	1	Atorvastatin	20	0	0	0	1	0	2021-07-15	56	16	0.01	0	16.7	0	135	0.5	0	63	410	40.9	0	18	0	5.32	2.19	3.52	0	0	0	1	17264	5
0	1	60	0	0	0	0	0	0	1	1	1	Atorvastatin	20	1	1	0	0	0	2023-03-31	60	5	0.018	0	37.3	0	130	22.6	1	96	385	36.9	0	8	0	4.62	0.67	2.55	0	0	0	1	26291.8	13
0	1	64	0	1	0	0	0	0	1	0	1	Atorvastatin	20	0	0	1	1	0	2019-11-21	37	12	0.01	0	49.4	0	114	4.5	0	84	294	34.7	1	6	0	5.02	1.15	3.58	0	0	0	1	16602.8	9
0	1	61	0	3	0	0	0	1	1	0	1	Atorvastatin	20	0	0	0	1	0	2022-08-19	74	15	0.015	0	29.6	0	142	2.4	0	69	352	39.9	0	17	0	3.04	1.52	1.69	0	0	0	1	37341.7	15
0	1	60	0	1	0	0	0	0	1	0	1	Atorvastatin	20	1	1	0	0	0	2021-03-04	45	10	0.01	0	47.4	0	108	2.1	0	59	290	34.9	1	8	0	4.12	1.79	1.85	0	0	0	1	20337	11
0	1	63	0	0	0	0	0	0	1	0	1	Atorvastatin	20	0	0	0	1	0	2021-05-22	50	23	0.01	0	29.1	0	127	0.5	0	68	517	32.9	1	51	1	2.23	1.57	1.26	0	0	0	1	18603.3	12
0	1	63	0	12	0	1	0	0	0	0	1	Atorvastatin	40	1	1	0	1	0	2018-06-09	113	5	0.05	1	130.5	0	96	14.5	1	119	580	37.9	0	8	0	2.68	0.4	1.32	1	0	0	1	42763.9	17
0	1	64	0	0	0	0	0	0	0	0	1	Atorvastatin	20	1	1	0	1	0	2017-03-27	109	10	0.11	1	49.6	0	114	9.1	0	71	132	34.2	1	18	0	3.39	1.13	1.35	0	0	0	1	30716.5	17
0	1	64	0	1	0	0	0	0	1	0	1	Atorvastatin	20	0	1	0	0	0	2022-11-02	102	15	0.016	0	49.3	0	165	2.2	0	98	535	39.9	0	58	1	3.71	1.28	2.16	0	0	0	1	22948.6	10
0	1	61	0	2	0	0	0	0	1	0	1	Atorvastatin	20	1	1	0	1	0	2017-08-08	48	5	0.01	0	29.1	0	142	5	0	99	499	37.7	0	17	0	3.73	1.36	2.16	0	0	0	1	22291.7	14
0	1	67	0	1	0	0	0	0	0	0	1	Atorvastatin	20	0	1	0	0	0	2015-12-16	103	7	0.01	0	47.6	0	112	5	0	142	415	30.4	1	11	0	4.03	1.65	2.41	0	0	0	1	19642.3	13
0	1	68	0	2	0	0	0	1	0	1	1	Atorvastatin	40	0	0	0	1	0	2018-07-31	89	12	0.01	0	76.8	0	130	1.6	0	100	314	39.5	0	18	0	2.99	1.25	1.49	0	0	0	1	16146.7	7
0	1	68	0	0	0	0	0	0	0	0	1	Atorvastatin	20	0	0	0	0	0	2016-12-23	62	8	0.01	0	31.8	0	117	5	0	69	180	31.5	1	5	0	4.09	0.63	2.19	0	0	0	1	17257.5	10
0	1	69	0	3	0	0	0	1	1	0	1	Atorvastatin	20	1	1	0	1	0	2021-01-29	38	7	0.01	0	12.8	0	146	1.5	0	60	345	41.1	0	15	0	3.34	1.1	2.22	0	0	0	1	44299.6	23
0	1	69	0	0	0	0	0	1	1	1	1	Atorvastatin	20	0	0	0	0	0	2020-12-04	63	8	0.01	0	45.2	0	101	2.2	0	77	538	31.7	1	6	0	4.39	1.87	2.81	0	0	0	1	16002.3	8
0	1	66	0	0	0	0	0	0	1	0	1	Atorvastatin	20	0	0	0	0	0	2020-07-23	85	13	0.01	0	71.9	0	147	7.6	0	82	398	35.6	0	23	0	2.58	1.35	1.17	0	0	0	1	18654.5	14
0	1	69	0	2	0	0	0	0	0	0	1	Atorvastatin	40	0	0	0	1	0	2019-03-27	44	9	0.01	0	28.3	0	106	0.9	0	61	236	34.4	1	7	0	6.06	0.82	3.64	0	0	0	1	22625.2	12
0	1	66	0	1	0	0	0	0	0	0	1	Atorvastatin	20	0	0	0	1	0	2023-06-10	66	7	0.011	0	21.1	0	151	2.4	0	80	341	37.2	0	22	0	4.12	1.87	1.87	0	0	0	1	21462.3	10
0	1	65	0	5	0	1	0	1	1	0	1	Atorvastatin	20	1	1	0	1	0	2021-04-07	538	13	0.04	1	176.7	0	82	83.3	1	83	241	37.8	0	11	0	6.22	0.7	4.28	0	0	0	1	24006	13
0	1	66	0	3	0	0	0	0	1	0	1	Atorvastatin	20	0	0	0	1	0	2020-10-29	152	16	0.01	0	170.8	0	137	13.8	1	101	478	40.2	0	18	0	5.16	1.29	3.42	0	0	0	1	29093.5	19
0	1	69	0	0	0	0	0	0	0	0	1	Atorvastatin	20	1	1	0	0	0	2019-11-24	62	8	0.02	0	46.9	0	136	64.5	1	62	309	32.4	1	90	1	2.77	1.45	1.69	0	0	0	1	21861	7
0	1	71	0	0	0	0	0	0	1	0	1	Atorvastatin	20	1	1	0	1	0	2017-03-11	102	9	0.01	0	34.7	0	119	5	0	86	225	33.4	1	24	0	3.85	0.5	1.71	0	0	0	1	17911.9	11
0	1	74	0	9	0	0	0	0	1	0	1	Atorvastatin	20	0	0	0	1	0	2016-07-07	61	26	0.01	0	40.2	0	120	5	0	159	403	37.6	0	54	1	3.41	1.6	1.89	1	0	0	1	21777.4	13
0	1	72	0	0	0	0	0	0	0	0	1	Atorvastatin	40	0	0	0	1	0	2018-05-26	49	6	0.01	0	23.9	0	129	2	0	67	293	39	0	10	0	5.63	2.06	3.26	0	0	0	1	18132.1	11
0	1	71	0	2	0	0	0	1	1	0	1	Atorvastatin	20	0	0	0	1	0	2015-08-11	111	8	0.01	0	43.1	0	123	5.69	0	120	477	38.4	0	25	0	5.01	2.15	2.88	0	0	0	1	21217.5	14
0	1	71	0	0	0	0	0	0	1	0	1	Atorvastatin	20	0	0	0	0	0	2021-11-18	83	11	0.01	0	25.4	0	132	3.2	0	76	240	35.7	0	15	0	3.52	1.01	2.17	0	0	0	1	17034	9
0	1	70	0	N	0	0	0	0	1	0	1	Atorvastatin	20	0	0	0	0	0	2020-05-23	43	6	0.01	0	8.5	0	154	1.2	0	68	305	40.1	0	10	0	3.46	1.71	1.98	0	0	0	1	13823.2	13
0	1	72	0	2	0	0	0	0	0	0	1	Atorvastatin	20	1	1	0	1	0	2023-12-09	161	6	0.041	1	82	0	116	47	1	78	248	34.1	1	14	0	3.86	0.68	2.31	0	0	0	1	18279.3	7
0	1	71	0	2	0	0	0	1	1	1	1	Atorvastatin	20	0	0	0	1	0	2017-03-14	207	54	0.01	0	36.6	0	159	7.4	0	74	267	38.9	0	16	0	6.55	1.76	4.34	0	0	0	1	22810.4	13
0	1	71	0	8	0	0	0	0	0	0	1	Atorvastatin	20	1	1	0	1	0	2016-08-22	140	9	0.04	1	172	0	129	5	0	89	218	38.4	0	13	0	4.01	0.97	2.36	0	0	0	1	62737.3	27
0	1	70	0	18	1	1	0	0	1	0	1	Atorvastatin	20	1	1	0	1	0	2020-11-18	715	21	0.15	1	765.8	0	150	3.8	0	118	360	34.2	1	36	0	4.42	4.64	1.9	1	0	0	1	80287.4	26
0	1	79	0	N	0	0	0	1	1	0	1	Atorvastatin	20	1	1	0	0	0	2019-10-31	113	8	0.01	0	28.7	0	113	6.3	0	84	386	31.4	1	13	0	4.36	1.67	2.96	0	0	0	1	18867.1	7
0	1	79	0	1	0	0	0	0	1	0	1	Atorvastatin	20	0	0	0	1	0	2021-10-29	79	9	0.01	0	14.5	0	135	2.4	0	66	387	38.9	0	15	0	4.35	1.72	2.77	0	0	0	1	17640.5	8
0	1	78	0	0	0	0	0	0	1	0	1	Atorvastatin	20	0	0	0	0	0	2019-12-28	58	10	0.01	0	35.7	0	121	2.7	0	84	300	44.3	0	10	0	7.41	2.37	4.64	0	0	0	1	18410.2	10
0	1	75	0	0	0	0	0	0	1	0	1	Atorvastatin	20	1	1	0	1	0	2023-07-11	144	8	0.016	0	37.9	0	148	86.8	1	71	349	35.4	0	48	1	3.86	1.22	2.39	0	0	0	1	22017.8	9
0	1	78	0	1	0	0	0	1	0	0	1	Atorvastatin	20	0	0	0	1	0	2019-08-07	89	9	0.01	0	18.2	0	129	0.3	0	75	212	35.5	0	12	0	4.15	0.85	2.74	0	0	0	1	18311.6	10
0	1	75	0	0	0	0	0	1	1	0	1	Atorvastatin	20	1	1	0	1	0	2023-03-13	930	15	0.065	1	555	0	162	15.2	1	86	N	36.8	0	19	0	N	N	N	0	0	0	1	61.5	0
0	1	78	0	1	0	0	0	1	1	0	1	Atorvastatin	20	0	0	0	1	0	2019-08-23	82	14	0.01	0	33.5	0	157	N	0	53	333	34.4	1	13	0	3.72	1.97	2.27	0	0	0	1	17418.2	8
0	1	75	0	0	0	0	0	0	1	0	1	Atorvastatin	20	0	0	0	0	0	2022-01-08	68	9	0.01	0	17.8	0	120	0.7	0	75	429	39.6	0	12	0	5.76	2.17	3.93	0	0	0	1	14599	13
0	1	78	0	0	0	0	0	0	0	0	1	Atorvastatin	20	0	0	0	0	0	2021-03-11	52	3	0.01	0	12	0	119	0.7	0	53	279	39.3	0	9	0	5.58	1.5	3.78	0	0	0	1	21963	12
0	1	77	0	0	0	0	0	0	1	0	1	Atorvastatin	20	0	0	0	0	0	2020-12-16	55	3	0.01	0	27.3	0	138	0.5	0	85	298	33.2	1	9	0	3.75	0.71	2.41	0	0	0	1	22138.8	9
0	1	76	0	0	0	0	0	0	1	0	1	Atorvastatin	20	1	1	0	0	0	2019-10-29	173	18	0.04	1	97.6	0	125	45.4	1	111	472	35.8	0	11	0	4.18	0.78	2.12	0	0	0	1	26275.1	10
0	1	76	0	8	0	0	0	1	1	0	1	Atorvastatin	20	1	1	0	1	0	2019-09-17	56	7	0.05	1	53.7	0	100	12.7	1	72	344	34.9	1	7	0	3.11	0.83	2.14	0	0	0	1	46198.4	23
0	1	79	0	2	0	0	0	0	1	0	1	Atorvastatin	20	0	0	0	0	0	2018-09-08	70	3	0.01	0	43.3	0	120	3.6	0	139	391	36.6	0	9	0	5.16	4.24	2.41	1	0	0	1	19492.7	14
0	1	82	0	1	0	0	0	0	1	0	1	Atorvastatin	20	0	0	0	1	0	2023-12-13	307	13	0.019	0	62.6	0	144	19	1	91	344	41.2	0	13	0	5.89	0.64	3.23	0	0	0	1	26152.3	14
0	1	81	0	1	0	0	0	0	1	1	1	Atorvastatin	20	0	0	0	0	0	2017-02-17	105	11	0.01	0	58.7	0	126	5	0	101	344	37.1	0	23	0	3.59	1.25	1.83	0	0	0	1	17288.8	13
0	1	83	0	0	0	0	0	1	0	0	1	Atorvastatin	20	0	0	0	0	0	2017-06-16	60	5	0.01	0	34.8	0	134	2.3	0	131	230	35	0	8	0	4.1	2.03	2.24	0	0	0	1	20688.1	15
0	1	83	0	2	0	0	0	1	1	0	1	Atorvastatin	40	0	0	0	1	0	2020-08-19	46	12	0.01	0	23.8	0	122	0.5	0	59	286	42.3	0	8	0	4.57	1.55	2.78	0	0	0	1	22918	13
0	1	82	1	15	0	0	0	0	1	0	1	Atorvastatin	20	1	1	0	1	0	2017-02-11	426	11	0.05	1	375	0	135	62.29	1	145	562	38.8	0	6	0	4.92	0.95	2,61	0	0	1	0	11597.3	3
0	1	84	0	N	0	0	0	0	1	0	1	Atorvastatin	20	0	0	0	0	0	2019-10-10	51	8	0.01	0	44.6	0	89	2.4	0	120	571	34.4	1	10	0	3.02	1.13	1.82	0	0	0	1	15064.6	7
0	1	80	0	2	0	0	0	1	1	1	1	Atorvastatin	20	0	0	0	1	0	2021-04-12	127	11	0.03	0	71.1	0	141	2.3	0	146	390	22.6	1	8	0	6.48	3.39	3.9	0	0	0	1	21950.6	11
0	1	82	0	5	0	0	0	0	1	0	1	Atorvastatin	20	0	1	0	1	0	2016-08-16	543	7	0.05	1	236.7	0	124	151.27	1	119	467	32.3	1	37	0	2.39	0.58	1.06	1	0	0	1	20133.6	12
0	1	81	0	0	0	0	0	0	1	0	1	Atorvastatin	20	0	0	0	0	0	2019-08-20	58	10	0.01	0	35.8	0	144	0.3	0	86	484	36.2	0	10	0	6.21	1.33	3.57	0	0	0	1	18742.7	8
0	1	82	0	3	0	0	0	1	1	0	1	Atorvastatin	40	0	0	0	1	0	2015-12-11	68	11	0.05	1	58.6	0	154	96.27	1	107	228	35.8	0	45	1	3.87	0.88	2.28	0	0	0	1	19254.2	11
0	1	80	0	6	0	0	0	1	1	1	1	Atorvastatin	20	0	0	0	1	0	2018-08-04	57	20	0.01	0	74.8	0	117	9.2	0	183	266	42.7	0	11	0	4.1	1.12	2.54	0	0	0	1	10865.3	9
0	1	80	0	2	0	0	0	0	0	0	1	Atorvastatin	20	0	0	0	0	0	2016-02-20	103	11	0.01	0	44	0	138	5	0	109	396	36.2	0	10	0	4.35	1.19	2.56	0	0	0	1	15702.8	10
0	1	83	0	3	0	0	0	0	1	0	1	Atorvastatin	20	0	0	0	0	0	2022-08-25	131	14	0.408	1	141	0	95	18	1	124	358	26.3	1	6	0	3.69	0.8	2.37	0	0	0	1	26173.6	10
0	1	80	0	0	0	0	0	1	0	0	1	Atorvastatin	20	0	0	0	0	0	2023-11-30	44	8	0.018	0	23.5	0	127	5.7	0	56	170	37.6	0	30	0	5.69	0.9	3.24	0	0	0	1	17503.2	9
1	1	91	0	8	0	0	0	0	1	0	1	Pivastatin	4	0	0	0	1	0	2020-07-21	1129	21	0.02	0	226.2	0	139	5.7	0	101	254	37.2	0	18	0	7.72	1.18	4.65	0	0	0	1	33021	14
0	1	83	0	0	0	0	0	0	0	0	1	Pivastatin	2	0	0	0	0	0	2020-03-19	56	<3	0.01	0	32.8	0	106	4.4	0	72	362	37.1	0	10	0	4.98	1.11	2.9	0	0	0	1	24152.7	12
0	1	81	0	1	0	0	0	1	1	0	1	Pivastatin	2	1	1	0	0	0	2020-07-13	150	17	0.05	1	58.1	0	104	24.8	1	103	501	33.2	1	12	0	3.94	1.79	2.39	0	0	0	1	24258.3	16
0	1	82	0	1	0	0	0	0	0	0	1	Pivastatin	2	0	0	0	0	0	2019-01-14	84	11	0.01	0	18.5	0	156	1.2	0	82	318	40	0	28	0	3.68	2.44	2.24	0	0	0	1	14276.1	5
0	1	82	0	0	0	0	0	1	1	0	1	Pivastatin	2	0	0	0	1	0	2023-08-04	66	10	0.006	0	27.6	0	132	0.6	0	61	324	37.3	0	16	0	2.98	1.25	1.4	0	0	0	1	19847.3	8
0	1	82	0	0	0	0	0	1	1	0	1	Pivastatin	4	0	0	0	1	0	2020-10-14	148	11	0.03	0	116.7	0	109	1.3	0	91	357	26.9	1	15	0	3.54	2.83	1.55	0	0	0	1	16750.1	6
0	1	82	0	N	0	0	0	1	1	0	1	Pivastatin	2	0	0	0	1	0	2019-06-04	36	9	0.01	0	30.9	0	114	1.1	0	72	261	37.8	0	21	0	6.74	1.41	4.2	0	0	0	1	19599.7	11
0	1	84	0	N	0	0	0	0	1	0	1	Pivastatin	2	1	1	0	0	0	2020-03-18	68	3	0.02	0	40.6	0	130	4.4	0	82	213	36.3	0	25	0	3.57	0.54	1.78	0	0	0	1	28796.1	13
0	1	88	0	2	0	0	0	0	1	1	1	Pivastatin	2	0	1	0	0	0	2019-06-13	48	9	0.02	0	34.9	0	123	11.2	1	112	472	36.9	0	7	0	4.71	0.87	2.83	0	0	0	1	20408.9	8
0	1	87	0	15	0	0	0	0	0	0	1	Pivastatin	2	0	0	0	1	0	2019-04-26	117	12	0.01	0	203.9	0	145	8.5	0	79	315	37.4	0	6	0	6.08	1.15	4.32	0	0	0	1	30010	10
1	0	83	0	2	0	0	0	1	1	0	1	Rosuvastatin	10	1	1	0	0	0	2015-05-14	2000	32	0.04	1	1725.7	1	145	<5	0	66	236	39	0	21	0	4.21	0.74	2.3	0	0	0	1	35775.6	17
1	0	75	1	20	1	1	0	0	1	0	1	Rosuvastatin	10	1	1	0	1	0	2015-12-05	1597	29	0.06	1	1127.8	1	131	5.9	0	95	257	39.2	0	14	0	6.48	2.09	4.36	1	0	1	0	94690.5	34
0	1	87	0	1	0	0	0	0	1	0	1	Rosuvastatin		0	0	0	1	0	2014-10-06	113	18	N	0	39	0	156	<5	0	102	284	37.3	0	13	0	4.22	1.55	2.42	0	0	0	1	12825.8	12
0	1	86	0	4	0	0	0	0	1	0	1	Rosuvastatin		1	0	0	1	0	2014-10-20	57	9	0.01	0	28.6	0	136	5.08	0	83	340	39.4	0	8	0	6.46	1.9	3.65	0	0	0	1	19760.2	14
1	1	58	0	19	1	1	0	1	1	0	1	Rosuvastatin	N	1	1	0	1	0	2014-05-06	1239	34	0.07	1	905.7	0	140	<5	0	78	371	38	0	13	0	4.45	1.04	2.51	0	1	1	0	27235.6	13
0	1	85	0	2	0	0	0	0	1	1	1	Rosuvastatin	10	0	0	0	1	0	2015-05-30	36	6	0.01	0	23.7	0	111	5.2	0	92	426	35.7	0	7	0	3.93	1.04	2.32	0	0	0	1	11352	8
0	1	89	0	2	0	0	0	0	1	0	1	Rosuvastatin	5	0	0	0	1	0	2014-07-17	151	8	0.01	0	68.4	0	120	3.8	0	108	266	36	0	12	0	5.46	0.97	3.33	0	0	0	1	14287.8	13
0	1	88	0	0	0	0	0	0	1	0	1	Rosuvastatin	10	1	1	0	1	0	2015-08-06	175	12	0.03	0	86.4	0	140	10.16	1	139	373	39	0	15	0	4.87	1.12	2.87	0	0	0	1	18658	12
0	1	85	0	4	0	0	0	0	1	0	1	Rosuvastatin	5	0	0	0	1	0	2018-08-18	99	3	0.01	0	98.1	0	105	1	0	242	391	33.9	1	12	0	1.86	0.57	0.94	0	0	0	1	19099.8	11
0	1	85	0	N	0	0	0	0	0	0	1	Rosuvastatin	5	0	0	0	0	0	2019-06-20	47	3	0.01	0	13.1	0	163	0.5	0	59	321	41.6	0	7	0	4.88	1.16	3.46	0	0	0	1	16158.9	11
0	1	89	0	0	0	0	0	0	0	0	1	Rosuvastatin	10	0	0	0	1	0	2015-06-26	45	10	0.01	0	31.8	0	121	5	0	103	253	34.6	1	8	0	4.57	1.65	2.63	0	0	0	1	16865.4	13
0	1	87	0	0	0	0	0	0	1	0	1	Rosuvastatin	10	0	0	0	0	0	2018-07-02	77	3	0.01	0	25.9	0	105	0.3	0	96	366	35	0	20	0	3.12	0.84	1.5	0	0	0	1	14611.8	11
0	1	86	0	N	0	0	0	0	1	0	1	Rosuvastatin	10	0	0	0	0	0	2015-07-04	259	14	0.01	0	45.4	0	147	5	0	109	326	37.3	0	22	0	2.97	0.47	1.63	0	0	0	1	14682.2	12
0	1	87	0	2	0	0	0	0	0	0	1	Rosuvastatin	10	0	0	0	1	0	2015-08-20	53	10	0.01	0	71.4	0	152	5	0	90	251	38.9	0	7	0	3.04	0.67	1.76	0	0	0	1	13640.4	10
0	1	86	0	0	0	0	0	0	0	0	1	Rosuvastatin	20	0	0	0	1	0	2022-11-12	125	9	0.015	0	47	0	125	1.3	0	77	333	36.8	0	33	0	2.72	0.51	1.65	0	0	0	1	23844.1	12
1	1	85	0	21	1	0	0	1	1	0	1	Rosuvastatin	10	1	1	0	0	0	2015-03-19	1597	33	0.02	0	387.3	0	120	17.54	1	99	161	29.9	1	20	0	4.16	1.12	2.23	0	0	0	1	23849.9	15
1	0	80	0	5	0	0	0	1	1	0	1	Rosuvastatin	10	1	1	0	1	0	2014-09-30	1455	33	0.02	0	124.2	0	106	87.47	1	98	187	35.6	0	39	0	3.32	0.71	1.53	0	0	0	1	22460.3	15
1	0	85	0	18	1	1	0	0	1	0	1	Atorvastatin	20	1	1	0	1	0	2015-01-12	1531	40	0.01	0	316.2	0	150	27.01	1	109	207	42.5	0	43	1	5.19	1.21	3.15	0	0	0	1	168868	73
1	1	91	0	3	0	0	0	0	1	0	1	Rosuvastatin	10	1	1	0	1	0	2015-01-15	2000	32	0.01	0	335	0	117	39.28	1	77	210	29.1	1	52	1	4.77	1.86	2.3	0	0	0	1	17349.3	13
1	1	70	0	2	0	0	0	0	1	0	1	Simvastatin	20	0	0	0	1	0	2015-02-07	2000	42	0.04	1	755.2	0	127	131.29	1	74	236	28.3	1	65	1	3.84	0.67	2.12	0	0	0	1	24368.9	24
1	0	77	0	4	0	0	0	0	0	0	1	Rosuvastatin	10	0	0	0	0	0	2015-01-07	2000	74	0.01	0	807	0	135	50.38	1	86	268	34.4	1	45	1	4.34	1.26	2.31	0	0	0	1	18638.2	15
1	1	74	0	2	0	0	0	0	0	0	1	Rosuvastatin	10	0	0	0	0	0	2015-07-21	1190	33	0.02	0	93.4	0	113	11.36	1	94	280	37.2	0	37	0	4.55	1.96	2.46	0	0	0	1	13875.8	10
1	1	75	0	5	0	0	0	1	1	0	1	Atorvastatin	20	1	1	0	0	0	2021-04-21	1270	15	0.05	1	216.7	0	75	4.3	0	89	281	33.5	1	14	0	5.49	1.72	3.8	0	0	0	1	30868.2	27
1	1	81	0	0	0	0	1	0	0	0	1	Atorvastatin	20	1	1	0	0	0	2023-11-22	1186	32	0.018	0	1256	1	107	173.2	1	109	282	34.4	1	14	0	2.89	0.5	1.02	1	1	1	0	58136.1	30
1	0	83	0	15	0	0	0	1	1	1	1	Atorvastatin	20	0	0	0	1	0	2019-08-21	1098	49	0.06	1	110.3	0	106	65.2	1	77	283	38.5	0	14	0	5.79	0.81	3.94	0	0	0	1	31274.7	13
1	1	88	0	0	0	0	0	0	1	0	1	Atorvastatin	40	1	1	0	1	0	2023-08-28	2811	27	0.038	1	873	0	135	37.4	1	115	285	37.2	0	34	0	4.24	1.18	2.31	0	0	0	1	21603.7	14
1	1	58	0	5	0	0	0	0	1	0	1	Rosuvastatin		1	1	0	1	0	2014-11-13	2000	43	0.03	0	142.9	0	133	72.01	1	73	288	32.4	1	27	0	5.03	1.39	3.16	0	0	0	1	26817.3	15
1	1	69	0	17	1	1	0	0	1	0	1	Atorvastatin	40	1	1	0	1	0	2018-03-19	1470	27	0.03	0	388.7	0	150	36.3	1	98	288	39.8	0	33	0	3.16	0.77	1.06	0	0	0	1	53220.3	33
1	1	85	0	4	0	0	0	0	1	0	1	Atorvastatin	20	0	0	0	1	0	2015-08-13	4000	388	0.05	1	546.7	0	153	59.73	1	108	291	38.6	0	185	1	4.58	0.93	2.13	0	0	0	1	23520.6	18
1	1	61	0	18	1	1	0	0	0	0	1	Atorvastatin	20	1	1	0	1	0	2020-02-19	1404	46	0.06	1	1093.8	1	139	53.1	1	124	291	36.3	0	22	0	4.25	0.66	2.55	1	1	1	0	53346.5	17
1	1	89	0	0	0	0	0	0	1	0	1	Atorvastatin	20	0	0	0	0	0	2020-02-25	1104	40	0.01	0	108.8	0	174	6.4	0	80	291	47.5	0	27	0	7.42	1.82	4.82	0	0	0	1	49994.5	25
1	0	82	0	2	0	0	0	1	0	0	1	Atorvastatin	20	1	1	0	1	0	2015-07-14	1185	19	0.04	1	275.2	0	118	46.97	1	135	292	35.3	0	22	0	2.71	0.67	1.23	0	0	0	1	25679.3	15
1	1	84	0	21	1	1	1	0	1	0	1	Atorvastatin	20	1	1	0	1	0	2022-12-26	1061	11	0.033	1	365	0	125	120.5	1	83	292	30.5	1	21	0	4.77	0.75	2.86	0	1	1	0	27669.8	9
1	1	85	1	15	0	1	0	0	1	0	1	Atorvastatin	20	1	1	0	1	0	2016-11-10	2617	32	0.03	0	782.6	0	125	86.91	1	110	295	36.7	0	25	0	2.77	0.7	1.12	1	0	1	0	34275.4	13
1	1	54	0	0	0	0	0	1	0	0	1	Atorvastatin	20	1	1	0	0	0	2020-12-21	1204	36	0.04	1	238.3	0	119	90.5	1	89	295	35.5	0	14	0	3.79	1.03	1.75	0	0	0	1	24850.9	11
1	1	61	0	5	0	0	0	0	0	0	1	Atorvastatin	20	0	0	0	1	0	2016-08-03	2835	34	0.01	0	187.3	0	139	<5	0	125	299	36.6	0	25	0	7.08	1.38	4.62	0	0	0	1	26063.7	15
1	1	90	0	3	0	0	0	1	1	1	1	Rosuvastatin	10	0	0	0	1	0	2023-03-14	3159	33	0.033	1	815	0	100	19.8	1	146	299	33.9	1	17	0	3.17	0.9	1.45	1	0	0	1	21087.6	14
1	0	69	0	5	0	0	0	0	1	0	1	Rosuvastatin	10	1	1	0	0	0	2015-07-15	1086	24	0.01	0	318.8	0	158	<5	0	100	303	41.3	0	27	0	4.26	1.63	2.49	0	0	0	1	30607.7	15
1	0	65	0	7	0	0	0	0	1	0	1	Atorvastatin	20	0	1	0	1	0	2018-12-13	>1600	18	0.02	0	1119.1	1	124	85.1	1	75	303	34.7	1	14	0	3.62	1.07	2.38	1	0	0	1	34240.8	14
1	1	80	0	8	0	0	0	1	0	0	1	Rosuvastatin		0	0	0	1	0	2015-03-20	1048	20	0.02	0	270.8	0	158	33.83	1	96	304	33.8	1	18	0	5.28	1.72	2.97	0	0	0	1	25910.2	21
1	1	63	0	20	1	1	0	0	1	1	1	Atorvastatin	20	1	1	0	1	0	2020-02-08	1048	44	0.24	1	669.7	0	131	43.9	1	76	305	39.9	0	20	0	3.23	0.83	1.13	0	0	0	1	95690.2	40
1	1	86	0	13	0	0	0	0	1	0	1	Rosuvastatin		1	1	0	1	0	2014-09-27	1256	30	0.01	0	481.7	0	161	N	1	95	306	42.6	0	11	0	5.01	0.92	3.08	0	0	0	1	27647.5	17
1	0	87	0	5	0	0	0	0	0	1	1	Rosuvastatin	10	0	0	0	1	0	2015-11-20	2000	76	0.06	1	771	0	130	>200	1	98	306	31.9	1	61	1	3.37	0.97	1.64	0	0	0	1	15244	8
1	1	77	0	1	0	0	0	1	1	0	1	Atorvastatin	20	1	1	0	0	0	2016-01-30	1004	41	0.09	1	948.7	0	124	<5	0	103	306	37.1	0	11	0	6.01	1.21	3.88	0	1	1	0	9267.26	3
1	1	88	0	2	0	0	0	0	1	0	1	Atorvastatin	20	1	1	0	1	0	2023-05-22	4535	37	0.068	1	761	0	143	107.4	1	99	310	35.7	0	29	0	4.61	1.36	2.6	0	1	1	0	16209.8	5
1	1	84	1	10	0	1	0	0	0	0	1	Rosuvastatin	10	1	1	0	0	0	2015-10-17	1503	31	0.05	1	651.7	0	120	<5	0	99	314	33.8	1	19	0	4.21	0.77	1.99	0	0	1	0	21233.9	10
1	0	86	0	N	0	0	0	0	0	0	1	Atorvastatin	20	1	1	0	1	0	2018-04-04	1154	18	0.02	0	962.4	0	162	175.5	1	124	316	24.8	1	21	0	2.62	1.08	1.46	1	0	0	1	27026.9	16
1	1	62	0	2	0	0	0	1	1	0	1	Atorvastatin	20	1	1	0	1	0	2022-12-26	1007	15	0.022	0	199	0	137	60.6	1	109	320	35.9	0	61	1	4.39	1.35	2.91	0	0	0	1	49760.7	25
1	1	59	0	2	0	0	0	1	1	0	1	Atorvastatin	20	1	1	0	1	0	2021-07-21	1502	20	0.01	0	115.3	0	147	63.2	1	81	324	37.9	0	33	0	2.55	0.79	1.52	0	0	0	1	25421	10
1	1	87	0	12	0	1	0	0	1	1	1	Atorvastatin	20	1	1	0	1	0	2021-01-11	6343	233	0.16	1	>3862	1	159	15.2	1	109	325	39.4	0	51	1	5.46	1.48	3.32	0	1	1	0	10821.9	1
1	1	87	0	17	1	1	0	1	1	0	1	Atorvastatin	20	1	1	0	1	0	2019-09-21	2658	62	0.18	1	1562.1	1	152	14.9	1	83	328	38.2	0	39	0	3.67	1.12	2.12	0	1	1	0	46130.2	12
1	1	83	0	1	0	0	1	0	1	0	1	Atorvastatin	20	1	1	0	1	0	2023-12-22	1483	56	0.023	0	349	0	169	68.1	1	79	329	34.8	1	28	0	4.49	0.65	2.36	1	1	1	0	80064.7	18
1	1	81	0	12	0	1	0	0	1	1	1	Atorvastatin	40	1	1	0	1	0	2016-01-08	1268	30	0.06	1	626.8	0	144	9.01	0	128	330	38.2	0	26	0	5.64	0.74	3.12	1	1	1	0	28331.7	12
1	1	62	0	0	0	0	0	1	1	1	1	Pivastatin	2	1	1	0	0	0	2023-04-15	1386	19	0.12	1	785	0	82	77.8	1	125	330	27.1	1	16	0	2.15	0.73	0.85	0	0	0	1	20309.9	9
1	0	74	0	19	1	1	0	1	1	1	1	Rosuvastatin	10	1	1	0	0	0	2015-06-04	1420	25	0.22	1	>3923	1	160	58.69	1	131	334	39.1	0	23	0	3.55	0.82	2.09	1	1	1	0	21984.2	11
1	1	59	0	10	0	0	0	1	1	0	1	Atorvastatin	20	1	1	0	1	0	2022-02-05	1069	21	0.03	0	270.5	0	144	56.7	1	107	338	42.9	0	21	0	5.87	0.96	3.73	0	0	0	1	36001	15
1	1	86	0	5	0	0	0	1	0	0	1	Atorvastatin	20	0	1	0	1	0	2022-11-09	1045	11	0.041	1	511	0	124	26.3	1	73	338	39.6	0	16	0	4.49	0.63	3.08	0	0	0	1	30052.4	14
1	0	61	0	9	0	0	1	1	0	0	1	Atorvastatin	20	1	1	0	1	0	2016-03-16	1600	22	0.1	1	424.2	0	130	10.41	1	151	344	38.6	0	17	0	4.91	0.89	2.97	1	0	0	1	56883.3	26
1	1	88	0	8	0	0	0	0	1	0	1	Atorvastatin	40	1	1	0	1	0	2017-10-29	1482	161	49.1	1	440.7	0	134	<5	0	125	344	41.1	0	14	0	4.38	0.93	2.66	1	1	1	0	19924.2	17
1	0	55	0	16	1	1	0	0	1	1	1	Pivastatin	2	1	1	0	1	0	2020-11-04	2645	51	0.04	1	422	0	161	2.1	0	128	345	41.8	0	16	0	4.53	1.19	2.33	1	0	0	1	42846.8	22
1	0	84	1	21	1	1	0	0	1	0	1	Atorvastatin	20	1	1	0	1	0	2016-01-21	1134	34	0.03	0	708.9	0	141	43.57	1	124	347	38.5	0	40	0	4.78	1.16	2.35	0	0	1	0	42095.8	21
1	0	83	1	13	0	1	0	1	1	0	1	Atorvastatin	20	1	1	0	1	0	2019-10-21	2297	21	0.7	1	1549.9	1	153	21.9	1	82	350	39.3	0	33	0	6.96	1.77	5.42	1	0	1	0	51586.7	17
1	0	72	0	23	1	1	0	0	1	0	1	Atorvastatin	20	1	1	0	1	0	2020-06-17	1033	37	1.44	1	554.4	0	140	52.4	1	93	351	28.4	1	25	0	4.71	1.79	2.56	1	0	0	1	114042	52
1	0	88	1	2	0	0	1	1	1	0	1	Atorvastatin	40	1	1	0	1	0	2017-08-24	1333	31	0.44	1	>3890	1	140	6.9	0	76	352	46.4	0	36	0	4.32	0.8	2.07	1	0	1	0	22542.7	9
1	1	59	0	20	1	1	0	1	1	1	1	Atorvastatin	40	1	1	0	0	0	2018-05-29	1088	16	0.09	1	302.7	0	155	19.2	1	89	353	43.3	0	14	0	6.15	0.99	4.15	1	0	0	1	417689	95
1	1	48	0	8	0	0	0	1	1	0	0	0	0	1	1	0	1	0	2015-11-21	2000	53	0.03	0	489.6	0	117	155.66	1	103	356	34.8	1	22	0	2.91	1.27	1.32	1	0	0	1	22958.8	13
1	1	89	0	10	0	0	0	0	1	0	1	Atorvastatin	20	0	0	0	0	0	2021-09-10	>1595	36	0.04	1	416.8	0	100	2	0	77	356	40.5	0	25	0	4.4	1.05	2.12	0	0	0	1	22770.4	8
1	1	90	0	3	0	0	0	1	0	0	1	Atorvastatin	20	1	1	0	1	0	2016-02-26	1445	29	0.06	1	472.8	0	141	120.93	1	119	361	39.6	0	13	0	5.95	0.87	4.09	0	0	0	1	45716.3	19
1	1	74	0	0	0	0	0	0	0	0	1	Atorvastatin	20	1	1	0	1	0	2022-07-25	1029	27	0.01	0	174	0	124	98.7	1	78	362	29.7	1	23	0	3.83	1.15	2.66	0	0	0	1	24667.8	19
1	0	85	0	2	0	0	0	0	1	0	1	Atorvastatin	20	1	1	0	1	0	2022-12-26	1450	14	0.02	0	282	0	101	134.8	1	95	366	35	0	23	0	3.93	0.78	1.91	0	0	0	1	22528.2	12
1	0	79	0	1	0	0	0	1	0	1	1	Atorvastatin	20	1	1	0	1	0	2023-12-05	2853	62	0.025	0	423	0	92	6	0	95	369	36.2	0	19	0	4.26	1.46	2.56	0	0	0	1	75406.7	32
1	1	64	0	9	0	0	0	1	0	0	1	Atorvastatin	20	1	1	0	0	0	2019-08-14	3394	78	0.05	1	1582.2	1	146	9.1	0	96	372	39.2	0	13	0	4.96	1.46	2.82	0	0	0	1	23642.8	9
1	1	93	0	3	0	0	0	0	1	1	1	Atorvastatin	20	1	1	0	1	0	2022-12-15	11610	132	0.265	1	1756	1	129	75.6	1	73	374	31.8	1	75	1	2.07	0.91	0.83	1	0	0	1	36024.4	21
1	1	39	0	17	1	1	0	0	1	0	1	Rosuvastatin	10	1	1	0	1	0	2015-11-18	3561	97	0.07	1	1289.9	1	150	40.03	1	135	377	41.6	0	56	1	4.82	1.63	2.42	0	0	0	1	35634.7	16
1	1	85	0	1	0	0	0	0	1	0	1	Atorvastatin	20	0	0	0	1	0	2016-12-22	2778	28	0.26	1	312.1	0	143	27.06	1	133	378	37.4	0	33	0	4.38	0.8	2.66	0	0	0	1	17090.8	9
1	1	64	0	2	0	0	0	0	1	0	1	Atorvastatin	20	1	1	0	1	0	2023-08-11	1520	24	0.022	0	618	0	140	97.8	1	118	379	37.8	0	21	0	2.96	0.9	1.44	0	0	0	1	15432.2	12
1	0	87	0	12	0	1	0	0	0	0	1	Atorvastatin	20	1	1	0	1	0	2021-11-11	2985	21	0.03	0	371.5	0	133	65.4	1	87	383	30.1	1	26	0	2.97	0.88	1.58	0	0	0	1	25701.2	10
1	1	63	0	0	0	0	0	0	0	0	1	Atorvastatin	20	1	1	0	0	0	2018-08-10	1126	17	0.09	1	934.2	0	118	217.5	1	96	386	24.1	1	56	1	3.88	1.12	2.54	0	0	0	1	33379.5	15
1	1	78	0	20	1	0	0	1	1	0	1	Atorvastatin	20	1	0	0	1	0	2017-02-24	1146	13	0.01	0	904.5	0	127	12.3	1	167	393	34.6	1	16	0	2.9	1.23	1.13	1	0	0	1	22810.1	11
1	0	81	0	7	0	0	0	0	1	0	1	Atorvastatin	20	0	1	0	1	0	2017-06-27	2880	20	0.07	1	631	0	157	15.3	1	108	394	41.2	0	26	0	4.27	0.75	2.82	0	0	0	1	36388.4	24
1	1	79	0	18	1	1	0	1	1	0	1	Atorvastatin	40	1	1	0	1	0	2018-07-17	1538	12	0.02	0	850.3	0	152	180.3	1	108	394	32.4	1	25	0	3.69	0.96	2.01	1	0	0	1	58697.1	30
1	1	84	0	17	1	1	0	0	1	1	1	Atorvastatin	20	1	1	0	1	0	2016-03-03	2841	26	0.06	1	1121.9	1	115	14.14	1	137	396	41.5	0	24	0	2.85	0.61	1.4	0	0	0	1	35404.8	16
1	1	84	0	0	0	1	0	1	1	0	1	Atorvastatin	20	1	1	0	1	0	2023-10-13	2712	25	0.117	1	>3000	1	130	32.2	1	94	399	39.5	0	8	0	6.61	1.51	3.98	0	1	1	0	20817.1	5
1	1	76	1	27	1	1	0	0	1	0	1	Atorvastatin	20	1	1	0	0	0	2023-10-10	1078	27	0.032	1	748	0	170	22.3	1	81	402	48.1	0	22	0	7.31	1.27	4.64	0	0	1	0	12508.1	2
1	0	88	0	0	0	0	0	0	1	0	1	Rosuvastatin		1	1	0	1	0	2015-02-23	1616	12	0.53	1	1126.6	1	102	131.7	1	136	404	32.1	1	23	0	3.59	0.87	2.08	1	0	0	1	26421.1	15
1	1	83	0	8	0	0	0	0	1	0	1	Atorvastatin	20	1	1	0	1	0	2016-02-17	2247	36	8.82	1	2707.5	1	103	<5	0	95	412	41.3	0	8	0	4.18	0.36	2.09	1	1	1	0	31323.7	15
1	0	78	0	N	0	0	0	0	0	0	1	Atorvastatin	20	1	1	0	1	0	2019-01-23	1123	16	0.02	0	371.1	0	122	3.4	0	114	412	35.7	0	20	0	4.66	1.67	2.76	0	0	0	1	34870.9	20
1	0	88	0	0	0	0	0	1	1	1	1	Atorvastatin	20	0	0	0	1	0	2022-12-24	1010	14	0.069	1	227	0	126	57.8	1	95	415	36.8	0	24	0	5.22	1.33	3.18	0	0	0	1	16886.5	12
1	0	89	1	16	1	1	1	0	1	0	1	Rosuvastatin	10	1	1	0	1	0	2015-11-10	2000	165	0.08	1	>4030	1	132	>200	1	108	419	34.8	1	12	0	4.16	1.25	2.02	1	0	1	0	34083.6	17
1	0	82	0	3	0	0	0	1	1	1	1	Atorvastatin	20	1	1	0	0	0	2023-05-18	3007	24	0.06	1	718	0	150	<0.5	0	145	420	35.1	0	37	0	3.7	0.98	2.53	0	0	0	1	31214.9	14
1	0	75	0	8	0	0	0	0	0	0	1	Atorvastatin	20	1	1	0	1	0	2016-01-01	1112	9	0.01	0	407.7	0	149	<5	0	85	424	41.9	0	19	0	5.84	0.73	3.6	0	0	0	1	52075.2	25
1	1	67	1	18	1	1	0	0	1	0	1	Atorvastatin	20	1	0	0	1	0	2017-04-10	1301	24	0.12	1	1602.8	1	79	61.6	1	83	429	34.3	1	10	0	3.14	0.36	1.18	1	0	1	0	12887.7	3
1	0	86	0	2	0	0	0	0	1	0	1	Atorvastatin	20	1	1	0	1	0	2021-04-07	1056	28	0.05	1	1140.4	1	91	113.2	1	114	429	29.9	1	17	0	2.7	0.82	1.2	1	0	0	1	85976	38
1	1	87	0	2	0	0	0	1	1	0	1	Pivastatin	4	0	1	0	1	0	2020-08-13	1499	36	0.04	1	462.1	0	91	116.7	1	195	430	31.5	1	33	0	2.47	1.07	1.16	0	0	0	1	24158.7	8
1	1	70	0	4	0	0	0	1	1	0	1	Atorvastatin	20	1	1	0	1	0	2015-10-28	1424	43	0.03	0	180.6	0	178	6.12	0	91	431	52.1	0	53	1	5.28	1.13	3.03	0	0	0	1	40779.4	21
1	1	80	0	9	0	0	0	1	0	0	1	Atorvastatin	40	0	0	0	1	0	2017-05-28	1346	20	0.02	0	270.6	0	153	0.4	0	82	431	44.5	0	35	0	6.61	1.2	4.43	0	0	0	1	23731.2	13
1	1	77	0	20	1	1	1	1	1	1	1	Atorvastatin	20	1	1	0	1	0	2022-12-01	1401	24	0.062	1	1197	1	115	70	1	286	432	25.9	1	23	0	2.79	1.22	1.6	1	1	1	0	226911	44
1	1	65	0	13	0	0	0	0	1	0	1	Atorvastatin	20	1	1	0	1	0	2020-03-07	1346	31	0.64	1	433.1	0	122	33.4	1	82	435	38.9	0	18	0	3.03	0.76	1.47	0	0	0	1	30205.4	15
1	0	85	0	15	0	1	0	0	1	0	1	Atorvastatin	20	1	1	0	0	0	2017-05-10	4266	44	0.08	1	>3950	1	122	155.8	1	144	437	24.3	1	24	0	2.3	0.99	0.99	1	0	0	1	66035	28
1	1	92	0	8	0	0	0	0	1	0	1	Pivastatin	4	0	0	0	1	0	2020-07-04	1251	15	0.02	0	301	0	138	8.9	0	110	437	38.3	0	12	0	4.75	0.58	3.08	0	0	0	1	26985.9	10
1	1	69	0	16	1	1	0	1	1	0	0	Atorvastatin	20	0	0	0	1	0	2016-02-04	1422	24	0.01	0	613.2	0	129	66.38	1	110	438	30.9	1	29	0	4.25	1.85	2.46	0	0	0	1	18460.1	13
1	1	80	0	0	0	0	0	0	1	0	1	Atorvastatin	20	0	1	0	0	0	2021-01-08	2801	48	0.05	1	335.8	0	100	159.7	1	258	439	28.4	1	24	0	3.66	0.75	1.76	1	0	0	1	19853.9	7
1	1	74	0	8	0	0	0	0	1	0	1	Atorvastatin	40	0	0	0	1	0	2019-02-09	3151	29	0.04	1	373.8	0	173	9.2	0	97	449	38.6	0	67	1	3.79	1.11	2.08	0	0	0	1	35070.5	14
1	0	86	1	25	1	1	0	0	1	0	1	Atorvastatin	20	1	1	0	1	0	2016-01-27	2109	41	0.04	1	1800.8	1	138	33.68	1	147	456	46.7	0	23	0	5.39	1.4	3.45	1	0	1	0	16530.9	6
1	1	88	0	3	0	1	0	0	1	1	1	Atorvastatin	20	1	1	0	1	0	2020-10-20	1074	21	0.2	1	608.7	0	107	98.6	1	349	460	32.8	1	14	0	4.07	0.75	2.15	1	0	0	1	33418.4	16
1	1	69	0	0	0	0	0	0	0	0	1	Atorvastatin	20	0	0	0	1	0	2022-12-26	10013	137	0.013	0	880	0	127	10	0	63	460	34.3	1	50	1	3.2	0.97	1.8	0	0	0	1	19368.8	12
1	1	83	0	23	1	1	0	1	1	1	1	Rosuvastatin	10	1	1	0	1	0	2015-10-26	1088	34	0.33	1	>4030	1	113	30.02	1	161	462	34.7	1	12	0	3.43	1.27	1.84	1	1	1	0	87517.9	34
1	1	75	0	3	0	0	0	0	0	0	1	Atorvastatin	20	1	1	0	1	0	2022-12-28	2506	28	0.179	1	756	0	151	127.4	1	135	463	29.7	1	41	1	3.66	1.07	1.76	1	1	1	0	25240.5	11
1	1	73	0	2	0	0	0	1	1	1	1	Atorvastatin	20	1	1	0	1	0	2020-12-05	1273	37	0.02	0	>4102	1	149	68.3	1	124	465	36.5	0	11	0	3.8	2.2	2.23	1	0	0	1	67283.6	21
1	1	69	0	13	0	1	0	1	1	1	1	Atorvastatin	20	1	1	0	1	0	2016-05-23	1471	29	0.59	1	2810.7	1	113	64	1	134	472	36.2	0	9	0	3.36	0.73	2.17	1	0	0	1	81003.4	28
1	1	95	0	12	0	1	0	0	0	0	1	Atorvastatin	40	1	1	0	1	0	2017-07-15	1170	6	0.08	1	594.7	0	55	57.6	1	145	473	28.7	1	11	0	2.56	1.09	1.51	0	1	1	0	84190.3	34
1	1	93	1	11	0	1	0	0	0	0	1	Atorvastatin	20	1	1	0	0	0	2019-08-13	4670	142	0.1	1	1781.7	1	135	96.9	1	125	474	32.7	1	13	0	4.74	1.25	3.12	1	0	1	0	113256	53
1	1	78	0	0	0	0	0	0	1	0	1	Atorvastatin	40	1	1	0	1	0	2018-10-31	6699	77	0.05	1	1443.1	1	143	213.5	1	103	481	35.4	0	16	0	4.75	0.77	1.76	0	0	0	1	24767	12
1	0	88	0	25	1	1	0	1	1	1	1	Atorvastatin	20	1	1	0	0	0	2023-01-10	1127	13	0.027	0	581	0	122	300.1	1	134	481	30.9	1	27	0	3.7	0.85	2.23	0	1	1	0	28526.2	8
1	1	83	0	7	0	0	0	1	1	0	0	Atorvastatin	20	0	1	0	1	0	2023-08-09	5171	69	0.032	1	697	0	118	48.6	1	123	487	43.7	0	25	0	5.3	2.57	2.78	1	0	0	1	22104.6	12
1	1	74	1	10	0	0	0	1	1	0	1	Atorvastatin	20	0	0	0	1	0	2016-05-04	1023	28	0.47	1	616.9	0	129	17.68	1	95	509	37.3	0	20	0	3.95	0.87	2.41	0	0	1	0	10808.5	3
1	1	91	0	1	0	0	0	1	1	1	1	Atorvastatin	20	0	1	0	1	0	2022-08-26	1037	40	0.076	1	279	0	154	52	1	117	515	38.4	0	18	0	4.29	1.29	3.08	0	0	0	1	27402	15
1	1	67	0	6	0	1	0	0	1	0	1	Atorvastatin	20	0	0	0	0	0	2020-06-06	1120	23	0.06	1	289.5	0	145	22.9	1	111	530	35.3	0	13	0	4.4	1.03	2.89	0	0	0	1	23458	10
1	1	65	0	12	0	1	0	0	0	1	1	Rosuvastatin	10	0	0	0	1	0	2018-05-15	2894	28	0.03	0	1157	1	135	7.8	0	163	533	38.3	0	25	0	3.66	0.94	1.99	0	0	0	1	24576.5	15
1	0	66	0	16	1	1	0	0	1	1	1	Atorvastatin	20	1	1	0	1	0	2022-02-16	1523	26	0.02	0	629.4	0	175	38.5	1	94	538	39.2	0	17	0	5.56	1.03	4.28	0	1	1	0	17875.9	4
1	1	71	1	12	0	1	0	0	1	1	0	0	0	1	1	0	1	0	2018-03-20	6047	87	0.09	1	>4105	1	140	56.1	1	244	551	32.9	1	58	1	2.83	0.64	1.16	1	0	1	0	53519.9	22
1	0	84	0	17	1	1	0	1	1	0	1	Atorvastatin	20	1	1	0	1	0	2020-02-18	1054	32	0.03	0	237.2	0	143	47.8	1	93	551	39.1	0	21	0	3.81	0.53	2.31	0	0	0	1	37376.2	16
1	1	86	0	3	0	0	0	1	1	0	1	Atorvastatin	20	1	1	0	1	0	2015-06-19	1505	23	0.13	1	631.4	0	85	44	1	176	570	30.8	1	60	1	3.24	1.69	1.79	1	0	0	1	63436.9	23
1	0	81	0	24	1	1	1	1	1	1	1	Atorvastatin	20	1	1	0	1	0	2021-10-27	1442	19	1.84	1	>3909	1	145	4.3	0	169	578	35.3	0	35	0	3.13	0.82	1.67	1	1	1	0	71360.5	19
1	1	80	0	10	0	0	0	1	1	1	1	Atorvastatin	20	0	0	0	1	0	2016-12-29	1061	31	0.04	1	1460.1	1	163	31.73	1	135	603	39.1	0	17	0	3.91	0.99	2.25	0	0	0	1	21165.3	13
1	1	79	0	5	0	0	0	1	1	0	1	Rosuvastatin	10	0	1	0	1	0	2015-11-10	10000	338	0.21	1	>4030	1	112	>200	1	571	606	28.2	1	127	1	2.98	1.92	0.86	1	1	1	0	9529.16	2
1	1	77	1	23	1	1	0	1	1	0	1	Atorvastatin	20	1	1	0	0	0	2015-06-04	2000	141	0.05	1	>3923	1	103	186.74	1	283	699	31	1	26	0	6.77	2.79	3.59	1	0	1	0	12163.8	4
1	1	83	0	0	0	0	0	0	0	0	1	Atorvastatin	20	0	0	0	0	0	2023-06-14	13712	171	0.012	0	470	0	155	11.7	1	69	726	36.5	0	37	0	4.57	1.75	3.11	0	0	0	1	19968.8	8
1	1	83	0	13	0	1	0	0	1	0	0	0	0	1	1	0	1	0	2023-01-04	1101	25	0.695	1	>3000	1	171	52.3	1	267	1194	29	1	91	1	3.07	2.66	2.06	1	1	1	0	24771.5	8
1	1	75	0	19	1	1	0	1	1	1	1	Atorvastatin	20	0	0	0	1	0	2022-04-21	4041	102	0.04	1	>4126	1	100	41.1	1	636	N	34.7	1	29	0	5.73	2.66	3.67	1	0	0	1	32693.2	39
0	1	86	0	0	0	0	0	0	1	0	1	Rosuvastatin	10	0	0	0	1	0	2014-09-30	135	13	N	0	N	0	116	1.22	0	149	291	35.8	0	11	0	2.52	0.74	0.66	0	0	0	1	8494.68	10
0	1	86	0	1	0	0	0	0	1	0	1	Rosuvastatin	10	0	0	0	1	0	2014-01-13	44	6	0.01	0	18.3	0	132	1.6	0	73	332	38.4	0	10	0	3.39	1.16	2.1	0	0	0	1	7382.98	8
0	1	93	0	0	0	0	0	0	1	0	1	Atorvastatin	20	0	0	0	0	0	2015-01-26	37	5	0.01	0	25	0	147	5	0	84	247	40.4	0	6	0	3.96	0.98	1.89	0	0	0	1	15426.8	15
0	1	93	0	6	0	0	0	0	1	0	1	Rosuvastatin	10	0	0	0	1	0	2014-03-18	41	4	0.01	0	36.6	0	137	5	0	83	197	37.5	0	27	0	2.88	0.98	1.45	0	0	0	1	19523.6	19
0	1	91	0	0	0	0	0	0	0	0	1	Rosuvastatin	10	1	1	0	0	0	2014-12-09	46	10	0.01	0	18.8	0	129	5	0	68	141	37.9	0	13	0	3.97	0.47	1.82	0	0	0	1	13921.9	9
0	1	91	0	6	0	0	0	0	1	0	1	Rosuvastatin	10	0	0	0	1	0	2015-02-14	57	6	0.02	0	83	0	124	5	0	97	361	38.9	0	11	0	5.82	0.69	2.75	0	0	0	1	16858.1	13
0	1	91	0	0	0	0	0	0	1	0	1	Rosuvastatin	10	0	0	0	0	0	2015-02-07	71	6	0.01	0	50.4	0	109	5.32	0	175	443	33.1	1	6	0	3.79	0.76	1.99	0	0	0	1	16202.1	16
0	1	90	0	8	0	0	0	0	0	0	1	Rosuvastatin	10	1	1	0	1	0	2014-10-28	102	9	0.03	0	82.9	0	132	200	1	123	283	28.3	1	7	0	2.95	0.67	1.12	0	0	0	1	31722.5	18
0	1	91	0	3	0	0	0	0	0	0	1	Rosuvastatin	10	1	1	0	1	0	2014-12-22	385	19	0.03	0	133.1	0	111	7.6	0	132	264	29.7	1	9	0	2.88	0.93	1.24	0	0	0	1	17525.5	9
0	1	93	0	0	0	0	0	0	1	0	1	Rosuvastatin	10	0	0	0	1	0	2015-01-21	40	19	0.1	1	64.8	0	151	5	0	70	245	36.9	0	14	0	2.87	0.7	1.45	0	0	0	1	10316.1	8
0	1	94	0	0	0	0	0	0	1	0	1	Rosuvastatin	10	0	0	0	1	0	2014-02-21	103	15	0.01	0	26.4	0	150	5.44	0	83	271	34.5	1	14	0	N	N	N	0	0	0	1	12388.1	12
0	1	92	0	1	0	0	0	0	1	0	1	Rosuvastatin	10	1	1	0	0	0	2014-10-13	48	6	0.01	0	78.8	0	101	20.24	1	205	543	31.8	1	11	0	2.95	0.76	1.41	1	0	0	1	17811.7	10
0	1	91	0	3	0	0	0	0	0	0	1	Rosuvastatin	10	0	0	0	1	0	2014-01-14	35	8	0.01	0	41.9	0	156	5	0	100	358	37.2	0	7	0	3.76	0.92	2.16	0	0	0	1	12412.7	10
0	1	99	0	4	0	0	0	0	0	0	1	Rosuvastatin	10	1	1	0	1	0	2014-11-18	495	11	0.01	0	120.3	0	117	122.6	1	103	364	29.5	1	9	0	3.14	1.06	1.39	0	0	0	1	32144.8	20

## Sheet: codebook to convert numbers
	group	sex	Discharge against medical advice	NIHSS>15	Consciousness disorder	Diabetes	Hypertension	Coronary heart disease	lipid-lowering drugs	type of lipid-lowering drug	pulmonary infection	infection	Muscle pain	Muscle weakness	Dark-colored urine	Troponin I >0.03	Myoglobin>1000	C-reactive protein>10	Serum albumin<35	Serum alanine aminotransferase>40	Acute kidney injury	die	Deteriorated	Discharged after improvement
1	Rhabdomyolysis group	male	Yes	Yes	Yes	Yes	Yes	Yes	Adopted	/	Yes	Yes	Yes	Yes	Yes	Yes	Yes	Yes	Yes	Yes	Yes	Yes	Yes	Yes
0	control group	female	No	No	No	No	No	No	Not adopted	Not adopted	No	No	No	No	No	No	No	No	No	No	No	No	No	No
